# Supplementary material for: The PI3K inhibitor taselisib overcomes letrozole resistance in a breast cancer model expressing aromatase
Source: PubMed Central journal article supplement (PMC4918946; doi:10.18632/genesandcancer.100), 2016-03
Supplement: ganc-07-073-s001.pdf [file ganc-07-073-s001.pdf]

# The PI3K inhibitor taselisib overcomes letrozole resistance in a breast cancer model expressing aromatase

A

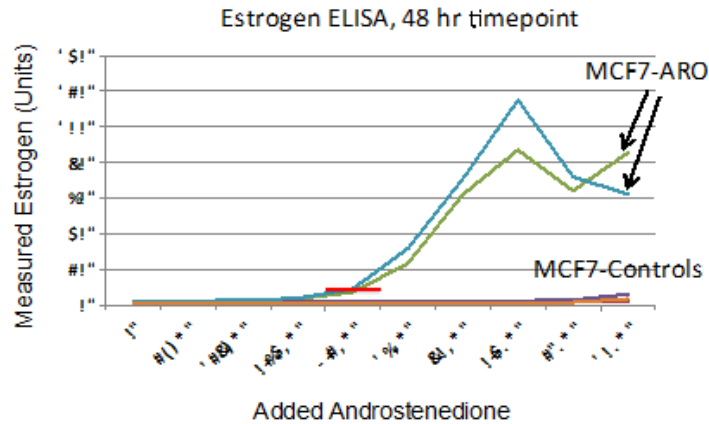

B

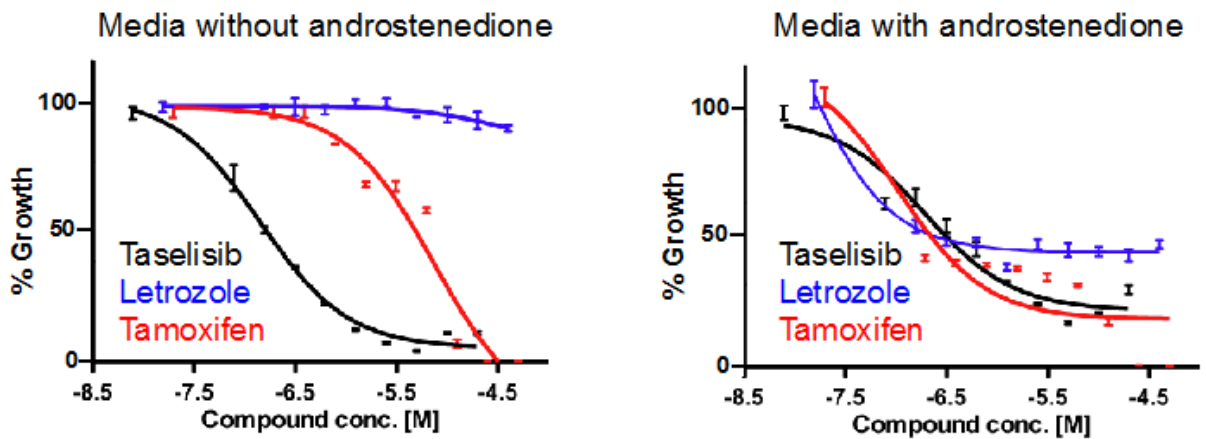

**Supplementary Figure 1:** MCF7 cells that stably express aromatase produce estrogen in response to androstenedione and become sensitive to inhibitors of the estrogen signaling pathway. (A) Estrogen production as measured by ELISA from MCF7 parental controls and MCF7-ARO cells. (B) Cell potency of taselisib, letrozole, and tamoxifen was determined in a 96-hour viability assay. Error bars indicate standard deviation around the mean.

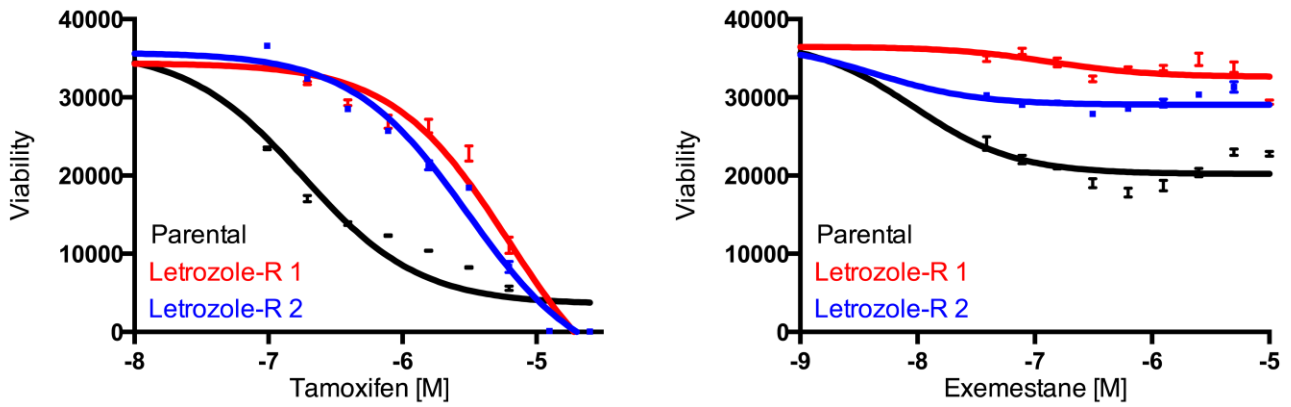

**Supplementary Figure 2:** MCF7-ARO Resistant pools are significantly more resistant estrogen therapies, compared to the parental MCF7-ARO line. Cell potency of tamoxifen and exemestane was determined in a 96-hour viability assay. Error bars indicate standard deviation around the mean.

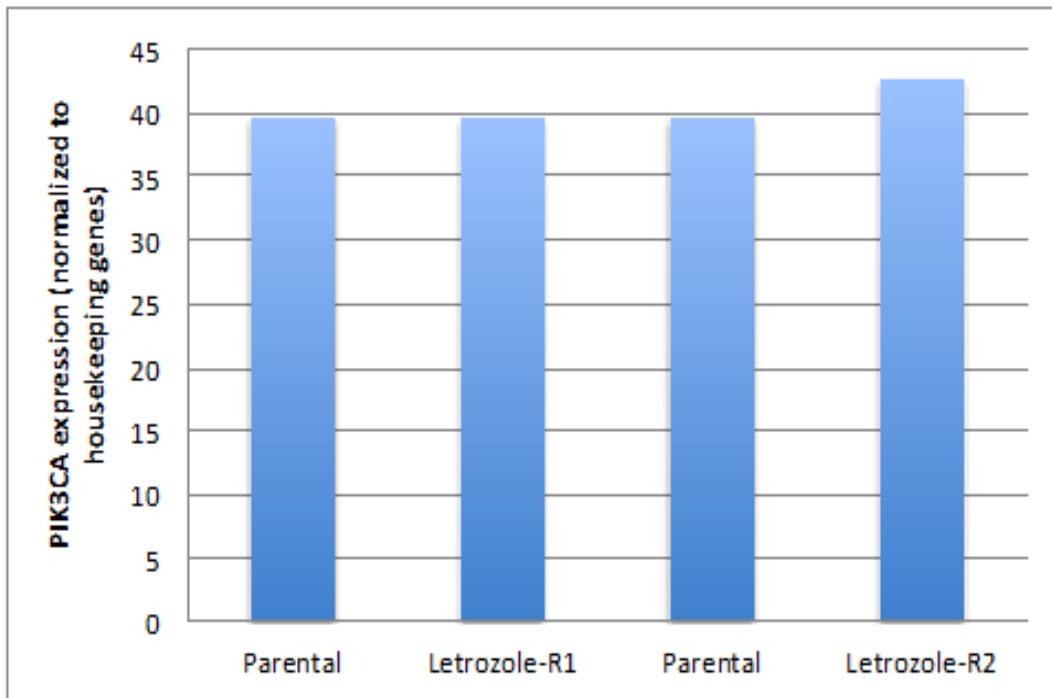

**Supplementary Figure 3:** Increased p110 $\alpha$  protein expression is not due to increased gene expression. PIK3CA expression (normalized to housekeeping genes) was determined in parental and letrozole resistant MCF7-ARO clones.

A.

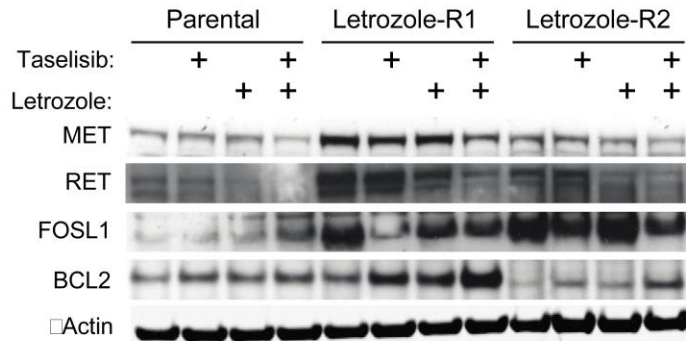

B.

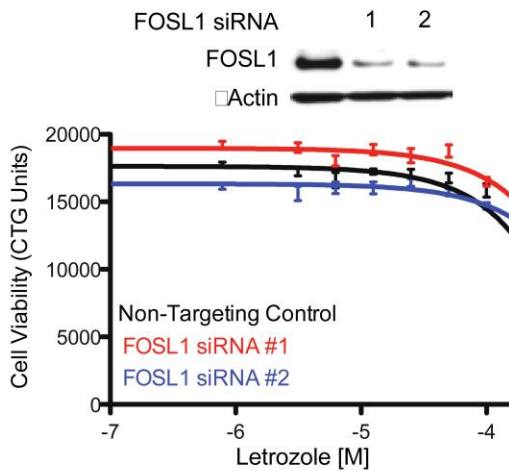

C.

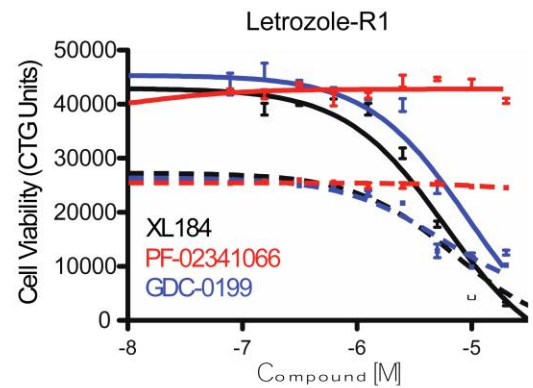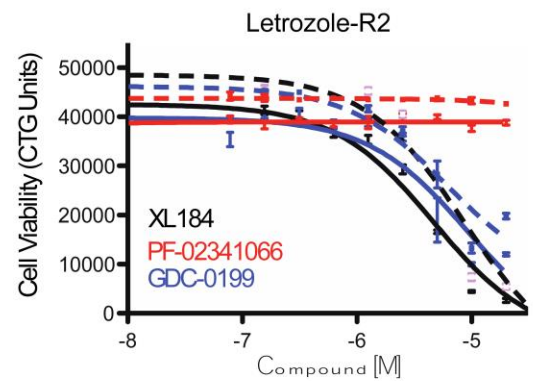

**Supplementary Figure 4:** Commonly described mechanisms of endocrine therapy resistance do suggest mechanisms of resistance in the MCF7-ARO line. (A) Increases in MET, RET, FOSL1, and BCL2 are detected in letrozole resistant MCF7-ARO cells. Protein changes with letrozole and taselisib treatments are shown by immunoblot. Treatments are for 24 hrs with 0.1  $\mu$ M taselisib and/or 0.1  $\mu$ M letrozole. (B) siRNA Knockdown of FOSL1 does not sensitize. Immunoblots for FOSL1 are from the 48 hr timepoint. Cell potency of letrozole in the MCF7-ARO letrozole resistant cell line was determined in a 96-hour viability assay. (C) Sensitivity of XL184, PF-02341066, and GDC-0199 in the letrozole resistant MCF7-ARO cells. Cell potency of compounds was determined in a 96-hour viability assay.

**Supplementary Table 1: Secreted Factor Screen Results. Percent changes in viability of drug treated samples compared to drug treated samples in the presence of a secreted factor. Each row is for a single secreted factor.**

|                                        | GDC-0032 | (1GDC-0032 (1 μM) | Letrozole (1 μM) | Letrozole (1 μM) |
|----------------------------------------|----------|-------------------|------------------|------------------|
| <b>4-1BB Ligand</b>                    | 7%       | -3%               | -4%              | -8%              |
| <b>4-1BB Receptor</b>                  | 7%       | 2%                | 14%              | 19%              |
| <b>Activin-A (Insect cell derived)</b> | 4%       | -10%              | -54%             | -50%             |
| <b>Activin-B (Insect cell derived)</b> | 2%       | -9%               | -29%             | -29%             |
| <b>AITRL</b>                           | 8%       | 0%                | -6%              | -24%             |
| <b>Amphiregulin (98 a.a.)</b>          | -3%      | 4%                | 16%              | 5%               |
| <b>ANG-1 (HeLa cell derived)</b>       | 5%       | 0%                | -5%              | -16%             |
| <b>ANG-2 (CHO cell derived)</b>        | 6%       | -2%               | -14%             | -2%              |
| <b>APRIL (insect cell derived)</b>     | 10%      | 1%                | -16%             | -24%             |
| <b>Artemin</b>                         | 5%       | -4%               | -12%             | -11%             |
| <b>BAFF</b>                            | 7%       | -3%               | -12%             | -3%              |
| <b>BAFF Receptor</b>                   | -3%      | 0%                | 1%               | -6%              |
| <b>BCA-1/BLC (CXCL13)</b>              | 5%       | -2%               | -25%             | -21%             |
| <b>BCMA</b>                            | 5%       | -4%               | -10%             | -19%             |
| <b>BDNF</b>                            | 7%       | -3%               | -24%             | -15%             |
| <b>beta-NGF</b>                        | 5%       | -1%               | 17%              | 20%              |
| <b>Betacellulin</b>                    | 19%      | 13%               | 81%              | 86%              |
| <b>BMP-1/PCP</b>                       | -18%     | -18%              | -28%             | -15%             |
| <b>BMP-13/CDMP-2</b>                   | 5%       | 12%               | 56%              | 65%              |
| <b>BMP-2</b>                           | 6%       | -4%               | -32%             | -36%             |
| <b>BMP-3</b>                           | -4%      | 0%                | 2%               | 5%               |
| <b>BMP-4 (HeLa cell derived)</b>       | 1%       | -15%              | -46%             | -38%             |
| <b>VIP-4 (truncated; E.coli derive</b> | 1%       | -7%               | -37%             | -30%             |
| <b>BMP-6 (HEK 293 cell derived)</b>    | 3%       | -7%               | -51%             | -40%             |
| <b>BMP-7 (CHO cell derived)</b>        | 8%       | -3%               | -14%             | -9%              |
| <b>BMP-8a</b>                          | -13%     | 0%                | 12%              | -7%              |
| <b>BMP-9</b>                           | -16%     | -12%              | -38%             | -40%             |
| <b>BRAK (CXCL14)</b>                   | 4%       | 0%                | 6%               | -11%             |
| <b>Cardiotrophin-1</b>                 | 15%      | 5%                | 8%               | 17%              |
| <b>CCL1/I-309/TCA-3</b>                | -18%     | -17%              | 5%               | 6%               |
| <b>CCL14a/HCC-1</b>                    | -9%      | -3%               | 13%              | -5%              |
| <b>CCL18/PARC</b>                      | -8%      | 2%                | 28%              | 17%              |
| <b>CCL2/JE/MCP-1</b>                   | -3%      | 4%                | 8%               | 15%              |
| <b>CCL3/MIP-1 alpha</b>                | -4%      | -1%               | -5%              | 5%               |
| <b>CCL4/MIP-1 beta</b>                 | -3%      | 1%                | 9%               | 9%               |
| <b>CCL5/RANTES</b>                     | -5%      | 3%                | 12%              | 5%               |
| <b>CCL7/MCP-3/MARC</b>                 | -9%      | -1%               | 4%               | -5%              |

|                                 |      |     |      |      |
|---------------------------------|------|-----|------|------|
| CCL8/MCP-2                      | -7%  | 2%  | -6%  | 13%  |
| CD22 (CHO cell derived)         | 7%   | 2%  | -5%  | -4%  |
| CDNF                            | -4%  | -5% | -11% | -18% |
| Chemerin                        | 1%   | -3% | -3%  | -14% |
| CNTF                            | 4%   | -5% | -15% | -11% |
| CTACK (CXCL27)                  | 5%   | -2% | -7%  | -10% |
| CTGF                            | 5%   | -2% | -14% | -7%  |
| CTGFL/WISP-2                    | 3%   | -2% | 12%  | -4%  |
| CXCL1/GRO alpha/KC/CINC-1       | -6%  | 1%  | 23%  | 20%  |
| CXCL10/IP-10/CRG-2              | -4%  | 5%  | 51%  | 26%  |
| CXCL12/SDF-1 alpha              | -6%  | 4%  | 30%  | -3%  |
| CXCL12/SDF-1 beta               | -3%  | 6%  | 7%   | 3%   |
| CXCL16                          | 0%   | -5% | -5%  | -8%  |
| CXCL2/GRO beta/MIP-2/CINC-      | -5%  | -2% | 3%   | 1%   |
| CXCL3/GRO gamma/CINC-2/DCII     | -4%  | 1%  | -6%  | 1%   |
| CXCL7/NAP-2                     | -7%  | 5%  | 0%   | -2%  |
| CXCL8/IL-8                      | -3%  | 1%  | 6%   | 11%  |
| CXCL8/IL-8                      | -11% | -3% | 16%  | 6%   |
| CYR61                           | 10%  | 4%  | 30%  | 26%  |
| DKK-1 (HEK293 cells)            | 8%   | 0%  | -16% | -35% |
| E-Selectin (CHO cell derived)   | 0%   | -1% | 12%  | 29%  |
| EG-VEGF                         | 6%   | 1%  | -4%  | -9%  |
| EGF (CON)                       | 23%  | 8%  | 106% | 102% |
| EGF (CON)                       | 13%  | 13% | 111% | 109% |
| EGF (CON)                       | 23%  | 11% | 100% | 114% |
| EGF (CON)                       | 10%  | 8%  | 128% | 121% |
| EGF Receptor (CHO cell derived) | 11%  | 1%  | -12% | -23% |
| ENA-78/CXCL5 (5-78 a.a.)        | 6%   | -2% | -22% | 2%   |
| ENA-78/CXCL5 (8-78 a.a.)        | 3%   | -5% | -10% | -18% |
| Endostatin                      | -4%  | 2%  | -5%  | -6%  |
| Eotaxin (CCL11)                 | 7%   | -2% | -15% | -10% |
| Eotaxin-2 (CCL24)               | 7%   | -3% | -10% | 0%   |
| Eotaxin-3 (CCL26)               | 4%   | -3% | -20% | -5%  |
| Epigen                          | 0%   | -4% | -8%  | -10% |
| Epiregulin                      | 0%   | 1%  | 50%  | 46%  |
| Exodus-2 (CCL21)                | 7%   | -5% | 4%   | 3%   |
| Flt1/AHSG (HEK293 cell deriv)   | -1%  | 1%  | 19%  | 41%  |
| FGF-10                          | 11%  | 21% | 133% | 136% |
| FGF-16                          | -3%  | 6%  | 2%   | -2%  |
| FGF-17                          | -3%  | 0%  | 10%  | 6%   |
| FGF-18                          | -2%  | -1% | 8%   | 38%  |

|                                |     |      |      |      |
|--------------------------------|-----|------|------|------|
| FGF-19                         | -6% | -2%  | -10% | -3%  |
| FGF-20                         | 8%  | -2%  | -4%  | 0%   |
| FGF-21                         | -6% | -2%  | -3%  | -10% |
| FGF-23                         | 6%  | 3%   | 28%  | 16%  |
| FGF-4                          | 9%  | 6%   | 50%  | 74%  |
| FGF-5                          | -4% | -3%  | 1%   | 1%   |
| FGF-6                          | -3% | -2%  | 42%  | 33%  |
| FGF-8                          | 5%  | 12%  | 65%  | 86%  |
| FGF-9                          | 15% | 7%   | 83%  | 68%  |
| FGF-acidic                     | 9%  | 23%  | 116% | 124% |
| FGF-basic                      | 19% | 27%  | 124% | 124% |
| FGF-basic (CON)                | 36% | 21%  | 93%  | 118% |
| FGF-basic (CON)                | 22% | 23%  | 112% | 132% |
| FGF-basic (CON)                | 34% | 20%  | 118% | 131% |
| FGF-basic (CON)                | 26% | 26%  | 142% | 141% |
| Flt-3 Ligand                   | -7% | -7%  | -18% | 7%   |
| Flt3-Ligand                    | 9%  | 3%   | -24% | -22% |
| Follistatin                    | 5%  | -1%  | 10%  | 9%   |
| Fractalkine (CX3CL1)           | 2%  | -8%  | -20% | -9%  |
| G-CSF                          | 5%  | -4%  | -30% | -33% |
| gAcrp30/Adipolean              | -5% | 8%   | 6%   | 2%   |
| gAcrp30/Adipolean Variant      | -6% | 1%   | 4%   | 7%   |
| Galectin-1                     | -9% | -3%  | -12% | 4%   |
| Galectin-3                     | 4%  | 7%   | 18%  | 51%  |
| GCP-2 (CXCL6)                  | 2%  | -5%  | -16% | -18% |
| GDF-11                         | 0%  | -9%  | -12% | -15% |
| F-15/MIC-1 (cell culture deriv | 7%  | -6%  | -16% | -1%  |
| GDF-2 (CHO cell derived)       | -3% | -18% | -60% | -57% |
| GDF-3                          | 5%  | -7%  | 4%   | -3%  |
| GDF-5 (BMP-14/CDMP-1)          | -6% | -6%  | 0%   | -6%  |
| GDF-7                          | 6%  | -2%  | -37% | -38% |
| GDNF                           | 12% | 1%   | 14%  | 15%  |
| GM-CSF                         | 6%  | 3%   | 24%  | 22%  |
| GMF-beta                       | 11% | 3%   | 7%   | 11%  |
| GRO-beta (CXCL2)               | 11% | 8%   | 6%   | 1%   |
| GRO-gamma (CXCL3)              | 7%  | -7%  | -8%  | 4%   |
| GRO/MGSA (CXCL1)               | -6% | -3%  | -13% | -12% |
| HB-EGF                         | 12% | 14%  | 125% | 145% |
| HCC-1/CCL14 (66 a.a.)          | 10% | -2%  | -14% | -17% |
| HCC-1/CCL14 (72 a.a.)          | 4%  | -4%  | -24% | -28% |
| Heregulin-beta1                | 31% | 37%  | 165% | 192% |

|                                |      |      |      |      |
|--------------------------------|------|------|------|------|
| HGF (CON)                      | 18%  | 0%   | 11%  | 2%   |
| HGF (CON)                      | 7%   | 2%   | 23%  | 10%  |
| HGF (CON)                      | 16%  | 1%   | 27%  | 8%   |
| HGF (CON)                      | 2%   | 3%   | 19%  | 11%  |
| HGF (Insect cell derived)      | 9%   | -6%  | -9%  | -22% |
| HVEM-Fc (Insect cell derived)  | -17% | -16% | -23% | -28% |
| I-309 (CCL1)                   | 10%  | 0%   | -36% | -30% |
| I-TAC (CXCL11)                 | 5%   | 3%   | 17%  | 3%   |
| ICAM-1 (CHO cell derived)      | 2%   | 7%   | 39%  | 38%  |
| IFN-beta (CHO cell derived)    | -18% | -27% | -48% | -53% |
| IFN-gamma                      | -28% | -27% | -65% | -46% |
| IFN-lambda 1                   | 0%   | 0%   | -3%  | -6%  |
| IFN-lambda 2                   | 2%   | -2%  | 0%   | -9%  |
| IFN-omega                      | -16% | -12% | -35% | -26% |
| IGF-BP1                        | -4%  | -1%  | -11% | -1%  |
| IGF-BP2 (insect cell derived)  | 5%   | -1%  | -1%  | -11% |
| IGF-BP3                        | -3%  | 0%   | -8%  | -7%  |
| IGF-BP4 (insect cell derived)  | 3%   | -4%  | -5%  | -6%  |
| IGF-BP5                        | -5%  | -7%  | -11% | -3%  |
| IGF-BP6 (insect cell derived)  | 4%   | -3%  | -3%  | -13% |
| IGF-BP7                        | -1%  | 1%   | 12%  | 19%  |
| IGF-I                          | -7%  | -6%  | 6%   | 5%   |
| IGF-II                         | -3%  | 3%   | 55%  | 76%  |
| IL-1 beta/IL-1F2               | -21% | -21% | -10% | 16%  |
| IL-10                          | 7%   | -4%  | -13% | -5%  |
| IL-11                          | 11%  | 6%   | -2%  | 9%   |
| IL-12                          | 0%   | 6%   | 78%  | 51%  |
| IL-12p70 (CHO cell derived)    | 7%   | -2%  | -24% | -31% |
| IL-12p80 (insect cell derived) | 9%   | 0%   | -18% | -13% |
| IL-13                          | 4%   | -6%  | -31% | -40% |
| IL-13 Variant                  | 6%   | -3%  | -30% | -25% |
| IL-15                          | 9%   | -1%  | -29% | -12% |
| IL-16 (121 a.a.)               | 5%   | -5%  | -36% | -32% |
| IL-16 (130 a.a.)               | 7%   | -4%  | -10% | -8%  |
| IL-17A                         | -1%  | 6%   | 58%  | 46%  |
| IL-17B                         | -1%  | 1%   | 11%  | -1%  |
| IL-17D                         | -1%  | 0%   | 8%   | -8%  |
| IL-17E                         | -3%  | -2%  | 6%   | -12% |
| IL-17F                         | -9%  | -3%  | 2%   | 17%  |
| IL-19                          | 12%  | 9%   | 8%   | 10%  |
| IL-1alpha                      | -16% | -17% | 16%  | -4%  |

|                             |      |      |      |      |
|-----------------------------|------|------|------|------|
| IL-1beta                    | -15% | -20% | 4%   | -1%  |
| IL-1RA                      | -8%  | -1%  | -14% | 0%   |
| IL-2                        | -5%  | 3%   | 4%   | -6%  |
| IL-20                       | 3%   | -4%  | -18% | -5%  |
| IL-21                       | 5%   | -1%  | -10% | 2%   |
| IL-22                       | 4%   | -5%  | -21% | -14% |
| IL-23 (insect cell derived) | 4%   | 0%   | -31% | -17% |
| IL-3                        | 8%   | -7%  | -6%  | 1%   |
| IL-31                       | 7%   | 4%   | 10%  | -2%  |
| IL-33                       | -13% | -16% | 7%   | 18%  |
| IL-34 (HEK293 cells)        | -7%  | -11% | 5%   | -11% |
| IL-4                        | 1%   | 1%   | 12%  | -6%  |
| IL-5                        | 6%   | -2%  | -14% | -17% |
| IL-6                        | -14% | -15% | -15% | -44% |
| IL-7                        | -3%  | 4%   | -5%  | -29% |
| IL-8 (72 a.a.) (CXCL8)      | -4%  | 3%   | 7%   | 4%   |
| IL-8 (77 a.a.) (CXCL8)      | -2%  | -2%  | 1%   | 8%   |
| IL-9                        | 6%   | -3%  | -6%  | -27% |
| IP-10 (CXCL10)              | -3%  | 0%   | 16%  | 18%  |
| KGF (FGF-7)                 | 33%  | 26%  | 116% | 133% |
| KLOTHO (CHO cell derived)   | 1%   | 1%   | -4%  | 4%   |
| LAG-1 (CCL4L1)              | 5%   | 0%   | 9%   | 17%  |
| LD78-beta (CCL3L1)          | 1%   | 2%   | 13%  | 20%  |
| LEC/NCC-4 (CCL-16)          | 3%   | -2%  | -4%  | 5%   |
| Leptin                      | -10% | 10%  | 3%   | -10% |
| LIGHT (Insect cell derived) | 5%   | -2%  | 10%  | 11%  |
| Lymphotactin (XCL1)         | 4%   | -2%  | 4%   | 6%   |
| M-CSF                       | 9%   | -4%  | -21% | -22% |
| MANF                        | -3%  | 1%   | 19%  | 15%  |
| Maspin                      | -1%  | -4%  | 6%   | 3%   |
| MCP-1/MCAF (CCL2)           | 0%   | 2%   | 18%  | 10%  |
| MCP-2 (CCL8)                | 7%   | 1%   | 20%  | 9%   |
| MCP-3 (CCL7)                | 4%   | 2%   | 26%  | -1%  |
| MCP-4 (CCL13)               | 6%   | 0%   | 3%   | 9%   |
| MDC (67 a.a.) (CCL22)       | 2%   | 0%   | -3%  | 14%  |
| MDC (69 a.a.) (CCL22)       | 7%   | -5%  | 9%   | 6%   |
| MEC (CCL28)                 | 4%   | 1%   | 13%  | 2%   |
| Media (+ DRUG)              | 11%  | 6%   | 8%   | 0%   |
| Media (+ DRUG)              | 4%   | 2%   | 10%  | 26%  |
| Media (+ DRUG)              | 13%  | 4%   | 16%  | 23%  |
| Media (+ DRUG)              | -2%  | 3%   | 9%   | 7%   |



|                 |      |      |      |      |
|-----------------|------|------|------|------|
| Media (+ DRUG)  | 6%   | 8%   | 5%   | 1%   |
| Media (+ DRUG)  | -10% | -15% | -2%  | 6%   |
| Media (+ DRUG)  | 6%   | 0%   | -3%  | -11% |
| Media (+ DRUG)  | 8%   | 0%   | -25% | -8%  |
| Media (+ DRUG)  | 7%   | -2%  | -42% | -55% |
| Media (+ DRUG)  | 7%   | -3%  | -15% | -16% |
| Media (+ DRUG)  | 6%   | -1%  | -32% | -11% |
| Media (+ DRUG)  | 3%   | -3%  | -19% | -20% |
| Media (+ DRUG)  | 7%   | 5%   | 17%  | 26%  |
| Media (+ DRUG)  | 1%   | 4%   | 19%  | -11% |
| Media (+ DRUG)  | 1%   | 0%   | -5%  | -10% |
| Media (+ DRUG)  | 1%   | -4%  | -4%  | -2%  |
| Media (+ DRUG)  | -2%  | -3%  | -11% | 7%   |
| Media (+ DRUG)  | 3%   | -4%  | -7%  | -7%  |
| Media (+ DRUG)  | 2%   | -3%  | -12% | -1%  |
| Media (+ DRUG)  | 1%   | -5%  | -8%  | 12%  |
| Media (+ DRUG)  | -1%  | -1%  | 23%  | 15%  |
| Media (+ DRUG)  | -1%  | 5%   | 7%   | -8%  |
| Media (+ DRUG)  | -3%  | -1%  | 4%   | -5%  |
| Media (+ DRUG)  | -7%  | 0%   | -14% | -10% |
| Media (+ DRUG)  | -6%  | 2%   | 1%   | 0%   |
| Media (+ DRUG)  | -2%  | -1%  | -5%  | 0%   |
| Media (+ DRUG)  | -2%  | -4%  | -12% | -3%  |
| Media (+ DRUG)  | -2%  | 0%   | 0%   | -15% |
| Media (+ DRUG)  | -7%  | 4%   | 20%  | 16%  |
| Media (+ DRUG)  | -4%  | 5%   | 25%  | -2%  |
| Media (+ DRUG)  | -8%  | 6%   | 3%   | 10%  |
| Media (+ DRUG)  | -7%  | 2%   | 7%   | 2%   |
| Media (+ DRUG)  | -3%  | -6%  | 4%   | 17%  |
| Media (+ DRUG)  | -5%  | 0%   | 20%  | 2%   |
| Media (+ DRUG)  | -7%  | -2%  | -3%  | 7%   |
| Media (+ DRUG)  | -10% | 3%   | 22%  | 17%  |
| Media (NO DRUG) | 109% | 105% | 93%  | 104% |
| Media (NO DRUG) | 88%  | 117% | 110% | 111% |
| Media (NO DRUG) | 111% | 103% | 100% | 106% |
| Media (NO DRUG) | 77%  | 104% | 111% | 112% |
| Media (NO DRUG) | 115% | 77%  | 110% | 106% |
| Media (NO DRUG) | 92%  | 100% | 97%  | 102% |
| Media (NO DRUG) | 112% | 101% | 103% | 104% |
| Media (NO DRUG) | 96%  | 103% | 98%  | 103% |
| Media (NO DRUG) | 107% | 103% | 107% | 86%  |

|                           |      |      |      |      |
|---------------------------|------|------|------|------|
| Media (NO DRUG)           | 98%  | 106% | 99%  | 86%  |
| Media (NO DRUG)           | 114% | 95%  | 87%  | 107% |
| Media (NO DRUG)           | 98%  | 100% | 99%  | 92%  |
| Media (NO DRUG)           | 111% | 98%  | 106% | 102% |
| Media (NO DRUG)           | 93%  | 100% | 94%  | 93%  |
| Media (NO DRUG)           | 109% | 99%  | 107% | 97%  |
| Media (NO DRUG)           | 97%  | 93%  | 92%  | 97%  |
| Media (NO DRUG)           | 114% | 102% | 98%  | 102% |
| Media (NO DRUG)           | 85%  | 103% | 102% | 111% |
| Media (NO DRUG)           | 106% | 100% | 85%  | 99%  |
| Media (NO DRUG)           | 79%  | 96%  | 101% | 92%  |
| Media (NO DRUG)           | 107% | 103% | 95%  | 95%  |
| Media (NO DRUG)           | 89%  | 98%  | 75%  | 99%  |
| Media (NO DRUG)           | 106% | 95%  | 94%  | 89%  |
| Media (NO DRUG)           | 147% | 158% | 219% | 223% |
| Media (NO DRUG)           | 100% | 97%  | 94%  | 80%  |
| Media (NO DRUG)           | 81%  | 87%  | 97%  | 90%  |
| Media (NO DRUG)           | 102% | 88%  | 93%  | 90%  |
| Media (NO DRUG)           | 81%  | 95%  | 87%  | 85%  |
| Media (NO DRUG)           | 104% | 92%  | 76%  | 79%  |
| Media (NO DRUG)           | 81%  | 99%  | 90%  | 85%  |
| Media (NO DRUG)           | 107% | 86%  | 87%  | 79%  |
| Media (NO DRUG)           | 82%  | 95%  | 96%  | 93%  |
| MIA                       | 3%   | -2%  | 11%  | 6%   |
| MIA-2                     | 6%   | -6%  | 8%   | 2%   |
| Midkine                   | 3%   | -4%  | 6%   | 11%  |
| MIG (CXCL9)               | 1%   | -1%  | 29%  | 8%   |
| MIP-1alpha (CCL3)         | 6%   | 1%   | 26%  | -9%  |
| MIP-1beta (CCL4)          | 4%   | 1%   | -15% | -7%  |
| MIP-3 (CCL23)             | 4%   | -2%  | 14%  | -12% |
| MIP-3alpha (CCL20)        | 2%   | 0%   | -2%  | 3%   |
| MIP-3beta (CCL19)         | 5%   | -3%  | 16%  | 0%   |
| MIP-4 (CCL18)             | 7%   | 1%   | 42%  | 30%  |
| MIP-5 (CCL15)             | -4%  | 5%   | 0%   | -1%  |
| Myostatin                 | -1%  | -2%  | -2%  | -10% |
| Myostatin Propeptide      | -1%  | 2%   | -12% | 15%  |
| NAP-2 (CXCL7)             | 8%   | 0%   | -12% | -19% |
| Neuritin                  | 7%   | -4%  | -2%  | 6%   |
| Neurturin                 | 13%  | 1%   | 18%  | 46%  |
| NNT-1/BCSF-3              | 10%  | -5%  | -16% | -10% |
| NOGGIN (293 cell derived) | 5%   | 1%   | 29%  | 3%   |

|                                  |      |      |      |      |
|----------------------------------|------|------|------|------|
| NOV                              | -1%  | -3%  | -3%  | -2%  |
| NRG1 beta 1 (CON)                | 34%  | 20%  | 131% | 164% |
| NRG1 beta 1 (CON)                | 24%  | 19%  | 151% | 194% |
| NRG1 beta 1 (CON)                | 33%  | 24%  | 147% | 174% |
| NRG1 beta 1 (CON)                | 23%  | 22%  | 150% | 158% |
| NT-3                             | 5%   | -2%  | -9%  | 7%   |
| NT-4                             | 5%   | 7%   | 23%  | 6%   |
| Oncostatin-M (209 a.a.)          | 15%  | 7%   | 150% | 155% |
| Oncostatin-M (227 a.a.)          | 13%  | 10%  | 74%  | 105% |
| Osteoprotegerin                  | -7%  | 1%   | -2%  | -3%  |
| OTOR                             | -2%  | -4%  | -5%  | -3%  |
| X40 Ligand (Insect cell derived) | 4%   | 1%   | 1%   | -10% |
| PDGF                             | -26% | -26% | -43% | -48% |
| PDGF-AA                          | 3%   | 1%   | -7%  | -12% |
| PDGF-AB                          | 2%   | 0%   | -2%  | -5%  |
| PDGF-BB                          | 5%   | 2%   | -10% | -5%  |
| PDGF-CC                          | 1%   | 2%   | 12%  | -1%  |
| VEGFR-1 (HEK293 cell derived)    | -5%  | -3%  | 5%   | 3%   |
| PEDF                             | 4%   | 4%   | 16%  | 12%  |
| Persephin                        | 0%   | 5%   | 30%  | 8%   |
| PF-4 (CXCL4)                     | 2%   | 5%   | -8%  | -1%  |
| Pleiotrophin                     | 2%   | -3%  | -5%  | -12% |
| PIGF-1                           | -3%  | -2%  | 0%   | 6%   |
| PIGF-2                           | -1%  | -2%  | 18%  | 1%   |
| PIGF-3                           | -4%  | 0%   | 8%   | 11%  |
| Prokineticin-2                   | 2%   | -3%  | -7%  | -5%  |
| Prolactin                        | -9%  | 0%   | -4%  | -7%  |
| PTHrP                            | -4%  | -3%  | -9%  | -19% |
| RANTES (CCL5)                    | 0%   | -4%  | -8%  | -2%  |
| Relaxin-2                        | -6%  | 0%   | -8%  | 8%   |
| Relaxin-3                        | -4%  | -3%  | 19%  | 19%  |
| RELM-beta                        | 3%   | 6%   | 37%  | 9%   |
| Resistin                         | -2%  | 4%   | 15%  | -9%  |
| sCD100 (CHO cell derived)        | -1%  | -4%  | -3%  | 0%   |
| sCD14 (293 cell derived)         | -3%  | -3%  | -8%  | -3%  |
| sCD23                            | -2%  | -1%  | 1%   | 4%   |
| CD27 Ligand (CHO cell derived)   | -34% | -38% | -82% | -94% |
| CD30 Ligand (CHO cell derived)   | 0%   | 4%   | 21%  | 17%  |
| sCD34 (CHO cell derived)         | 0%   | 4%   | 12%  | -1%  |
| sCD40 Ligand                     | -6%  | 3%   | 0%   | -9%  |
| SCF                              | 2%   | 1%   | -12% | -11% |

|                                  |      |      |       |       |
|----------------------------------|------|------|-------|-------|
| SCGF-alpha                       | 9%   | 6%   | 21%   | -6%   |
| SCGF-beta                        | 7%   | 3%   | 18%   | -8%   |
| SDF-1alpha (CXCL12)              | 3%   | 5%   | -13%  | -19%  |
| SDF-1beta (CXCL12)               | 2%   | -2%  | -6%   | -15%  |
| sDLL-1 (HEK293 cell derived)     | -2%  | 4%   | 3%    | -15%  |
| sDLL-4 (HEK293 cell derived)     | -3%  | -1%  | -4%   | 1%    |
| sFas Ligand (CHO cell derived)   | 4%   | -3%  | 4%    | -20%  |
| sFas Receptor                    | -2%  | -1%  | -4%   | -17%  |
| sFRP-1 (HeLa cell derived)       | -2%  | -1%  | 1%    | -14%  |
| IL-2Ralpha (Insect cell derived) | -1%  | -4%  | 11%   | -1%   |
| L-4Ralpha (HEK293 cell derive)   | 2%   | -4%  | -21%  | -8%   |
| L-6Ralpha (HEK293 cell derive)   | 0%   | -5%  | -25%  | -13%  |
| Slit2-N (HEK293 cell derived)    | 2%   | 2%   | 3%    | 7%    |
| Sonic Hedgehog                   | -2%  | -3%  | -4%   | 15%   |
| RC/Osteonectin (CHO cell deri)   | -26% | -27% | -28%  | -33%  |
| sRANK Ligand                     | 10%  | -3%  | -7%   | -13%  |
| sRANK Receptor                   | -8%  | -3%  | 6%    | -9%   |
| sTNF-receptor Type I             | -3%  | 0%   | -8%   | 3%    |
| sTNF-receptor Type II            | -1%  | -3%  | -15%  | -2%   |
| sTRAIL receptor-1                | -7%  | -3%  | -9%   | -10%  |
| sTRAIL receptor-2                | -7%  | -5%  | -9%   | 3%    |
| sTRAIL/Apo2L                     | -16% | -15% | -40%  | -30%  |
| TACI                             | 4%   | 0%   | -2%   | -6%   |
| TAFA-2                           | -1%  | -5%  | -2%   | -4%   |
| TARC (CCL17)                     | 0%   | 6%   | 1%    | 10%   |
| TECK (CCL25)                     | 2%   | 2%   | -10%  | -11%  |
| TFF-1                            | -1%  | -1%  | -4%   | -5%   |
| TFF-2                            | -4%  | -5%  | -13%  | -9%   |
| TFF-3                            | -4%  | -2%  | -8%   | -13%  |
| TGF-alpha                        | 10%  | 17%  | 153%  | 163%  |
| TGF-beta 1                       | -31% | -33% | -58%  | -65%  |
| TGF-beta 2                       | -21% | -19% | -37%  | -34%  |
| TGF-beta 3                       | -18% | -20% | -41%  | -39%  |
| GF-beta1 (HEK293 cell derivec)   | -7%  | -16% | 21%   | 11%   |
| GF-beta2 (HEK293 cell derivec)   | -5%  | -12% | -22%  | -38%  |
| TGF-beta3                        | -14% | -15% | -37%  | -38%  |
| Thrombopoietin/Tpo               | -4%  | 1%   | 15%   | 3%    |
| TL-1A                            | -2%  | 0%   | 2%    | -19%  |
| TLR-3 (HEK293 cell derived)      | -4%  | 1%   | 12%   | 7%    |
| TNF-alpha                        | -34% | -40% | -110% | -102% |
| TNF-beta                         | -28% | -32% | -54%  | -50%  |

|                               |      |      |      |      |
|-------------------------------|------|------|------|------|
| TPO                           | 8%   | 1%   | -34% | -27% |
| TSG                           | -8%  | -2%  | 4%   | 0%   |
| TSLP                          | 10%  | -3%  | -16% | -1%  |
| TWEAK                         | -8%  | -4%  | 12%  | 27%  |
| TWEAK Receptor                | -3%  | 0%   | -4%  | -7%  |
| VAP-1 (CHO cell derived)      | 6%   | -3%  | -7%  | -11% |
| Vaspin                        | -2%  | 1%   | 6%   | 2%   |
| VCAM-1 (HEK293 cell derived)  | -3%  | 5%   | 29%  | 26%  |
| VEGF-A (121 a.a.)             | 8%   | -1%  | -1%  | -2%  |
| VEGF-A (165 a.a.)             | 11%  | 5%   | 17%  | 20%  |
| VEGF-B                        | -3%  | -2%  | 19%  | 1%   |
| VEGF-C (HEK293 cell derived)  | -4%  | -1%  | 25%  | 20%  |
| VEGF-D (HEK293 cell derived)  | 8%   | -1%  | 15%  | -4%  |
| Visfatin                      | 7%   | 23%  | 115% | 116% |
| WISP-1                        | 0%   | 0%   | -11% | -10% |
| WISP-3                        | 1%   | -3%  | 14%  | 3%   |
| WNT-1                         | 9%   | -2%  | -12% | -12% |
| Wnt-4                         | -24% | -24% | -36% | -43% |
| WNT-7A (HEK 293 cell derived) | 2%   | -9%  | -15% | 1%   |
| WISP-3                        | 7%   | 1%   | 4%   | 17%  |
| Angiogenin                    | -4%  | -3%  | -12% | -10% |
| AREG / GAS6                   | -6%  | -5%  | 0%   | -2%  |
| BMP-10                        | -10% | -3%  | -18% | -37% |
| BMP-5                         | 6%   | 0%   | 1%   | -10% |
| BOC                           | 2%   | -3%  | -4%  | -17% |
| Cathepsin S                   | 12%  | 6%   | 15%  | -5%  |
| CCL11/Eotaxin                 | 14%  | 11%  | 21%  | 16%  |
| CCL13/MCP-4                   | 2%   | 1%   | 22%  | -4%  |
| CCL14 (two aa forms) / CCL15  | -11% | -6%  | -21% | -5%  |
| CCL15/MIP-1 delta             | 3%   | 2%   | 28%  | -1%  |
| CCL15/MIP-1 delta             | 4%   | 3%   | 6%   | -11% |
| CCL16/HCC-4                   | -6%  | 2%   | 15%  | -5%  |
| CCL17/TARC                    | -4%  | 2%   | 7%   | -8%  |
| CCL19/MIP-3 beta              | 8%   | 0%   | 5%   | -6%  |
| CCL20/MIP-3 alpha             | 16%  | 14%  | 31%  | 6%   |
| CCL21/6CKine                  | 1%   | 14%  | 21%  | -10% |
| CCL22/MDC                     | 5%   | 3%   | 24%  | -7%  |
| CCL23/Ck beta 8-1             | 3%   | 3%   | 27%  | 1%   |
| CCL23/MPIF-1                  | 6%   | 4%   | 14%  | -2%  |
| CCL24/Eotaxin-2/MPIF-2        | 0%   | -1%  | 9%   | -10% |
| CCL25/TECK                    | 0%   | 1%   | 10%  | -11% |

|                             |     |     |      |      |
|-----------------------------|-----|-----|------|------|
| CCL26/Eotaxin-3             | 8%  | 4%  | -20% | -15% |
| CCL27/CTACK                 | 18% | 13% | 24%  | 22%  |
| CCL28                       | 7%  | 9%  | 27%  | -6%  |
| L1/MIP-1 alpha Isoform LD78 | 6%  | 4%  | 17%  | -8%  |
| CCL4L1/LAG-1                | 1%  | 6%  | 24%  | 1%   |
| CD30 Ligand/TNFSF8          | 13% | 2%  | 30%  | 9%   |
| CD40 Ligand/TNFSF5          | 3%  | 4%  | 8%   | -5%  |
| CTGF                        | -6% | -5% | -24% | 0%   |
| CX3CL1/Fractalkine          | 5%  | 3%  | 21%  | -8%  |
| CXCL11/I-TAC                | 0%  | 2%  | 26%  | -1%  |
| CXCL12/SDF-1                | 3%  | 5%  | 13%  | -12% |
| CXCL13/BLC/BCA-1            | 10% | 18% | 50%  | 6%   |
| CXCL14/BRAX                 | 13% | 15% | 21%  | -4%  |
| CXCL17/VCC-1                | 1%  | 6%  | 17%  | -6%  |
| CXCL4/PF4                   | 7%  | 8%  | 16%  | -9%  |
| CXCL5/ENA-70                | 5%  | 2%  | 10%  | -14% |
| CXCL5/ENA-74                | 3%  | 10% | 13%  | 7%   |
| CXCL5/ENA-78                | 4%  | 4%  | 23%  | 1%   |
| CXCL6/GCP-2                 | 6%  | 4%  | 11%  | -16% |
| CXCL9/MIG                   | 0%  | 0%  | 11%  | 0%   |
| Decorin                     | -9% | -5% | -17% | -2%  |
| Desert Hedgehog/Dhh         | -2% | 6%  | 21%  | -1%  |
| Dkk-2                       | 7%  | 3%  | 24%  | -1%  |
| Dkk-3                       | 2%  | 1%  | 19%  | 4%   |
| Dkk-4                       | 4%  | 2%  | 17%  | -1%  |
| DPPIV                       | 7%  | 5%  | 18%  | 4%   |
| Draxin                      | 19% | 18% | 6%   | -8%  |
| EGF                         | 19% | 15% | 172% | 114% |
| EGF (CON)                   | 18% | 26% | 173% | 124% |
| EGF (CON)                   | 11% | 6%  | 144% | 121% |
| EGF (CON)                   | 22% | 19% | 167% | 101% |
| EGF / IL7 / NT3 / Eotaxin   | 7%  | 11% | 130% | 109% |
| EGF / NRG / FGFb / HGF      | 32% | 30% | 228% | 167% |
| Endocan/ESM-1               | -1% | 3%  | 21%  | 1%   |
| Ephrin-A1                   | 1%  | -1% | 10%  | -23% |
| Ephrin-A3                   | -2% | 3%  | -6%  | -2%  |
| Ephrin-A3                   | 5%  | 5%  | 7%   | -15% |
| Ephrin-A4                   | 3%  | -1% | 0%   | -13% |
| Ephrin-A4                   | 15% | 8%  | 8%   | -6%  |
| Ephrin-A5                   | -1% | 8%  | 12%  | -14% |
| Ephrin-A5                   | 11% | 11% | 21%  | 4%   |

|                            |      |      |      |      |
|----------------------------|------|------|------|------|
| Ephrin-B3                  | 6%   | 5%   | 10%  | -3%  |
| Ephrin-B3                  | 8%   | 10%  | 11%  | -7%  |
| ephrinB2                   | -13% | 0%   | -3%  | -8%  |
| EPO                        | -9%  | 1%   | -20% | -9%  |
| Fas Ligand/TNFSF6          | -8%  | -1%  | -1%  | -4%  |
| FGF-12                     | 10%  | 5%   | -4%  | -5%  |
| FGF-22                     | 30%  | 24%  | 123% | 81%  |
| FGF-3                      | 21%  | 26%  | 97%  | 71%  |
| FGF-acidic                 | 41%  | 37%  | 198% | 148% |
| FGF-basic                  | 30%  | 31%  | 177% | 120% |
| FGF-basic (CON)            | 29%  | 35%  | 204% | 136% |
| FGF-basic (CON)            | 12%  | 23%  | 154% | 115% |
| FGF-basic (CON)            | 31%  | 33%  | 187% | 135% |
| FGF-BP                     | 9%   | 9%   | 9%   | 7%   |
| FGF1 / IL6                 | 27%  | 27%  | 174% | 137% |
| FGF2 / CCL3                | 16%  | 22%  | 155% | 129% |
| FGF2 / CCL3 / CCL20        | 24%  | 23%  | 157% | 134% |
| Fibulin 5/DANCE            | 7%   | 10%  | 3%   | 7%   |
| FLRG                       | -4%  | -6%  | 1%   | -6%  |
| Frizzled-1                 | 2%   | 3%   | 9%   | -12% |
| Frizzled-10                | -5%  | 2%   | 7%   | -17% |
| Frizzled-4                 | 2%   | 1%   | 18%  | -15% |
| Frizzled-5                 | 15%  | 10%  | 39%  | 13%  |
| Frizzled-5                 | 2%   | 9%   | 29%  | -11% |
| Frizzled-7                 | 3%   | 3%   | 23%  | 2%   |
| Frizzled-8                 | -3%  | 6%   | -4%  | -8%  |
| Gas-6                      | -6%  | 0%   | 20%  | 22%  |
| GDF-1                      | 22%  | 21%  | 100% | 72%  |
| GDF-15                     | -6%  | -5%  | -11% | -3%  |
| GDF-8/Myostatin            | 4%   | 5%   | 10%  | 1%   |
| GFR alpha-3/GDNF R alpha-3 | 3%   | 0%   | 19%  | -3%  |
| GITR Ligand/TNFSF18        | 9%   | 6%   | 4%   | -8%  |
| Gremlin                    | 2%   | 6%   | 14%  | -13% |
| HGF (CON)                  | 18%  | 19%  | 137% | 69%  |
| HGF (CON)                  | -2%  | -2%  | 3%   | 2%   |
| HGF (CON)                  | 8%   | 10%  | 21%  | 4%   |
| HGF / AREG                 | -5%  | -6%  | 2%   | 14%  |
| HGF / CCL28                | -4%  | -10% | -9%  | 7%   |
| HGF / GAS6                 | -7%  | -10% | -8%  | -12% |
| IFN                        | -22% | -16% | -27% | -48% |
| IFN-alpha                  | -12% | -15% | -54% | -44% |

|                               |      |      |      |      |
|-------------------------------|------|------|------|------|
| IFN-alpha 1                   | -8%  | -4%  | -1%  | -17% |
| IFN-alpha 2                   | -10% | -13% | -33% | -43% |
| IFN-alpha 4                   | -1%  | -5%  | -12% | -20% |
| IFN-alpha 4                   | 4%   | -5%  | -25% | -21% |
| IFN-alpha A                   | -18% | -21% | -57% | -47% |
| IFN-alpha B2                  | -14% | -13% | -58% | -50% |
| IFN-alpha C                   | -11% | -15% | -33% | -33% |
| IFN-alpha D                   | -5%  | -5%  | -6%  | -11% |
| IFN-alpha F                   | -7%  | -9%  | -15% | -30% |
| IFN-alpha G                   | -9%  | -9%  | -15% | -29% |
| IFN-alpha H2                  | -20% | -18% | -59% | -49% |
| IFN-alpha I                   | -15% | -16% | -35% | -44% |
| IFN-alpha J1                  | 5%   | 0%   | 0%   | -21% |
| IFN-alpha K                   | -10% | -1%  | -17% | -25% |
| IFN-alpha WA                  | -12% | -9%  | -21% | -31% |
| IL-1 alpha/IL-1F1             | -13% | -14% | 21%  | 17%  |
| IL-17/IL-17A                  | 3%   | 1%   | 17%  | 2%   |
| IL-17C                        | 9%   | 5%   | 26%  | -16% |
| IL-18 / FGFBP1                | -5%  | -4%  | -11% | -11% |
| IL-18/IL-1F4                  | 0%   | -2%  | 8%   | -2%  |
| IL-1F7/FIL1 zeta              | 10%  | 5%   | 22%  | 4%   |
| IL-24                         | 17%  | 12%  | 41%  | 16%  |
| IL-26/AK155                   | 2%   | 4%   | 29%  | -30% |
| IL-26/AK155                   | 18%  | 13%  | 22%  | -4%  |
| IL-27                         | 0%   | 2%   | 20%  | -2%  |
| IL-28A/IFN-lambda 2           | 7%   | 8%   | 20%  | 10%  |
| IL-28B/IFN-lambda 3           | 7%   | 5%   | 16%  | 5%   |
| IL-29/IFN-lambda 1            | 10%  | 7%   | 5%   | 0%   |
| IL-32 alpha                   | -6%  | 4%   | 2%   | -3%  |
| IL-36 alpha/IL-1F6            | 8%   | 6%   | 23%  | 13%  |
| IL-36 beta/IL-1F8             | 5%   | 5%   | 35%  | 3%   |
| IL-36 gamma/IL-1F9            | 2%   | 8%   | 35%  | 4%   |
| 6 / IL8 / GMCSF / CXCL1 / MCI | -1%  | 1%   | 17%  | 9%   |
| IL8 / CXCL1 / CXCL2 / CXCL3   | -2%  | 3%   | 36%  | 25%  |
| Indian Hedgehog/Ihh           | 0%   | 5%   | 19%  | -14% |
| Insulin                       | -4%  | -6%  | 24%  | 15%  |
| Klotho beta                   | 3%   | 0%   | 6%   | -18% |
| LEDGF                         | 13%  | 13%  | 32%  | 15%  |
| Lefty-A                       | 2%   | 2%   | 8%   | -10% |
| LIF                           | 0%   | 0%   | 15%  | 23%  |
| Media (+ DRUG)                | 12%  | 11%  | 42%  | 16%  |



|                |      |      |      |      |
|----------------|------|------|------|------|
| Media (+ DRUG) | -2%  | -3%  | -9%  | 4%   |
| Media (+ DRUG) | 7%   | 10%  | 40%  | 4%   |
| Media (+ DRUG) | -9%  | -7%  | -16% | -8%  |
| Media (+ DRUG) | -6%  | -1%  | -7%  | -5%  |
| Media (+ DRUG) | -7%  | -7%  | -9%  | 6%   |
| Media (+ DRUG) | -6%  | -5%  | -16% | -8%  |
| Media (+ DRUG) | -6%  | -9%  | -18% | -1%  |
| Media (+ DRUG) | 1%   | 5%   | 1%   | 2%   |
| Media (+ DRUG) | 0%   | 0%   | -8%  | 3%   |
| Media (+ DRUG) | -6%  | -7%  | -8%  | 7%   |
| Media (+ DRUG) | -6%  | -8%  | -13% | -3%  |
| Media (+ DRUG) | -9%  | -5%  | -9%  | -6%  |
| Media (+ DRUG) | -4%  | -5%  | -21% | -7%  |
| Media (+ DRUG) | -7%  | -9%  | -13% | -11% |
| Media (+ DRUG) | -3%  | -3%  | 4%   | -2%  |
| Media (+ DRUG) | 1%   | -1%  | -12% | 0%   |
| Media (+ DRUG) | -4%  | -1%  | -18% | 12%  |
| Media (+ DRUG) | -1%  | -3%  | -6%  | -7%  |
| Media (+ DRUG) | -10% | -6%  | -16% | 1%   |
| Media (+ DRUG) | -5%  | -2%  | -11% | -9%  |
| Media (+ DRUG) | -6%  | -10% | -5%  | 1%   |
| Media (+ DRUG) | -5%  | -9%  | -7%  | -7%  |
| Media (+ DRUG) | -5%  | -10% | -18% | -12% |
| Media (+ DRUG) | 5%   | -3%  | -5%  | 1%   |
| Media (+ DRUG) | 4%   | 4%   | -7%  | -4%  |
| Media (+ DRUG) | -1%  | -3%  | -5%  | -3%  |
| Media (+ DRUG) | -2%  | -5%  | -12% | 1%   |
| Media (+ DRUG) | -3%  | -2%  | -20% | -2%  |
| Media (+ DRUG) | -3%  | 0%   | -11% | 5%   |
| Media (+ DRUG) | -5%  | -3%  | -15% | 1%   |
| Media (+ DRUG) | 1%   | -5%  | -15% | -1%  |
| Media (+ DRUG) | 17%  | 14%  | 17%  | 5%   |
| Media (+ DRUG) | 6%   | 6%   | 0%   | -5%  |
| Media (+ DRUG) | 0%   | 14%  | 16%  | -2%  |
| Media (+ DRUG) | 0%   | 5%   | 4%   | -1%  |
| Media (+ DRUG) | 2%   | 6%   | 15%  | -8%  |
| Media (+ DRUG) | -6%  | -2%  | -15% | 5%   |
| Media (+ DRUG) | 5%   | 2%   | 23%  | 0%   |
| Media (+ DRUG) | -1%  | -4%  | -18% | 5%   |
| Media (+ DRUG) | 10%  | 7%   | 9%   | 1%   |
| Media (+ DRUG) | 1%   | -4%  | -5%  | -2%  |

|                 |      |      |      |      |
|-----------------|------|------|------|------|
| Media (+ DRUG)  | 6%   | 10%  | 10%  | -7%  |
| Media (+ DRUG)  | -2%  | -4%  | 3%   | 0%   |
| Media (+ DRUG)  | 3%   | 4%   | 17%  | 4%   |
| Media (+ DRUG)  | 1%   | -7%  | -6%  | 3%   |
| Media (+ DRUG)  | 11%  | 1%   | 32%  | 1%   |
| Media (+ DRUG)  | 2%   | 1%   | 4%   | 7%   |
| Media (+ DRUG)  | 7%   | 2%   | 9%   | 5%   |
| Media (+ DRUG)  | 9%   | 7%   | 16%  | -5%  |
| Media (+ DRUG)  | 5%   | 0%   | -2%  | 11%  |
| Media (+ DRUG)  | 5%   | 5%   | -15% | -14% |
| Media (+ DRUG)  | -4%  | 1%   | -11% | -6%  |
| Media (+ DRUG)  | -9%  | -5%  | -15% | -2%  |
| Media (+ DRUG)  | 3%   | -4%  | -5%  | 5%   |
| Media (+ DRUG)  | -4%  | -1%  | -4%  | -4%  |
| Media (+ DRUG)  | -7%  | -5%  | -5%  | 4%   |
| Media (+ DRUG)  | -11% | -1%  | 10%  | 13%  |
| Media (+ DRUG)  | 9%   | 5%   | 29%  | 19%  |
| Media (+ DRUG)  | 7%   | 12%  | 19%  | -7%  |
| Media (+ DRUG)  | 11%  | 8%   | 13%  | -5%  |
| Media (+ DRUG)  | 5%   | 6%   | 23%  | -2%  |
| Media (+ DRUG)  | 5%   | 5%   | 16%  | 8%   |
| Media (+ DRUG)  | -1%  | 5%   | 11%  | -9%  |
| Media (+ DRUG)  | 4%   | 4%   | 16%  | 2%   |
| Media (+ DRUG)  | 0%   | 6%   | 28%  | 15%  |
| Media (NO DRUG) | 108% | 130% | 165% | 86%  |
| Media (NO DRUG) | 92%  | 103% | 86%  | 90%  |
| Media (NO DRUG) | 127% | 136% | 168% | 91%  |
| Media (NO DRUG) | 111% | 104% | 128% | 103% |
| Media (NO DRUG) | 123% | 132% | 158% | 103% |
| Media (NO DRUG) | 104% | 105% | 125% | 95%  |
| Media (NO DRUG) | 127% | 125% | 168% | 90%  |
| Media (NO DRUG) | 109% | 105% | 128% | 110% |
| Media (NO DRUG) | 123% | 123% | 146% | 88%  |
| Media (NO DRUG) | 100% | 116% | 122% | 94%  |
| Media (NO DRUG) | 120% | 121% | 164% | 104% |
| Media (NO DRUG) | 95%  | 101% | 109% | 103% |
| Media (NO DRUG) | 124% | 125% | 164% | 102% |
| Media (NO DRUG) | 103% | 105% | 114% | 99%  |
| Media (NO DRUG) | 130% | 124% | 179% | 100% |
| Media (NO DRUG) | 111% | 106% | 89%  | 94%  |
| Media (NO DRUG) | 114% | 128% | 145% | 95%  |

|                 |      |      |      |      |
|-----------------|------|------|------|------|
| Media (NO DRUG) | 103% | 101% | 90%  | 96%  |
| Media (NO DRUG) | 117% | 125% | 146% | 89%  |
| Media (NO DRUG) | 106% | 97%  | 86%  | 80%  |
| Media (NO DRUG) | 132% | 124% | 134% | 95%  |
| Media (NO DRUG) | 107% | 97%  | 76%  | 86%  |
| Media (NO DRUG) | 168% | 161% | 242% | 164% |
| Media (NO DRUG) | 95%  | 89%  | 89%  | 97%  |
| Media (NO DRUG) | 122% | 120% | 170% | 92%  |
| Media (NO DRUG) | 85%  | 104% | 80%  | 113% |
| Media (NO DRUG) | 109% | 128% | 137% | 84%  |
| Media (NO DRUG) | 97%  | 92%  | 82%  | 103% |
| Media (NO DRUG) | 124% | 112% | 136% | 102% |
| Media (NO DRUG) | 90%  | 92%  | 76%  | 104% |
| Media (NO DRUG) | 118% | 111% | 138% | 85%  |
| Media (NO DRUG) | 102% | 87%  | 96%  | 102% |
| Media (NO DRUG) | 108% | 105% | 95%  | 102% |
| Media (NO DRUG) | 104% | 99%  | 82%  | 90%  |
| Media (NO DRUG) | 88%  | 90%  | 84%  | 93%  |
| Media (NO DRUG) | 95%  | 86%  | 79%  | 101% |
| Media (NO DRUG) | 82%  | 97%  | 72%  | 94%  |
| Media (NO DRUG) | 90%  | 89%  | 85%  | 90%  |
| Media (NO DRUG) | 86%  | 96%  | 91%  | 82%  |
| Media (NO DRUG) | 89%  | 85%  | 91%  | 104% |
| Media (NO DRUG) | 103% | 108% | 104% | 116% |
| Media (NO DRUG) | 97%  | 94%  | 80%  | 87%  |
| Media (NO DRUG) | 91%  | 93%  | 85%  | 83%  |
| Media (NO DRUG) | 91%  | 98%  | 84%  | 78%  |
| Media (NO DRUG) | 96%  | 89%  | 83%  | 87%  |
| Media (NO DRUG) | 83%  | 84%  | 89%  | 96%  |
| Media (NO DRUG) | 85%  | 90%  | 81%  | 93%  |
| Media (NO DRUG) | 77%  | 93%  | 96%  | 110% |
| Media (NO DRUG) | 92%  | 94%  | 91%  | 109% |
| Media (NO DRUG) | 101% | 99%  | 84%  | 96%  |
| Media (NO DRUG) | 91%  | 102% | 70%  | 101% |
| Media (NO DRUG) | 86%  | 92%  | 93%  | 96%  |
| Media (NO DRUG) | 82%  | 87%  | 91%  | 90%  |
| Media (NO DRUG) | 84%  | 91%  | 84%  | 105% |
| Media (NO DRUG) | 75%  | 87%  | 77%  | 81%  |
| Media (NO DRUG) | 90%  | 91%  | 86%  | 101% |
| Media (NO DRUG) | 117% | 98%  | 97%  | 123% |
| Media (NO DRUG) | 98%  | 93%  | 100% | 107% |

|                 |      |      |      |      |
|-----------------|------|------|------|------|
| Media (NO DRUG) | 92%  | 93%  | 102% | 79%  |
| Media (NO DRUG) | 88%  | 90%  | 87%  | 92%  |
| Media (NO DRUG) | 88%  | 77%  | 76%  | 89%  |
| Media (NO DRUG) | 91%  | 95%  | 62%  | 104% |
| Media (NO DRUG) | 85%  | 88%  | 85%  | 93%  |
| Media (NO DRUG) | 104% | 89%  | 101% | 95%  |
| Media (NO DRUG) | 107% | 100% | 116% | 113% |
| Media (NO DRUG) | 100% | 108% | 112% | 99%  |
| Media (NO DRUG) | 91%  | 94%  | 89%  | 95%  |
| Media (NO DRUG) | 93%  | 92%  | 80%  | 88%  |
| Media (NO DRUG) | 82%  | 88%  | 81%  | 79%  |
| Media (NO DRUG) | 78%  | 87%  | 62%  | 100% |
| Media (NO DRUG) | 86%  | 89%  | 81%  | 89%  |
| Media (NO DRUG) | 93%  | 92%  | 94%  | 111% |
| Media (NO DRUG) | 120% | 109% | 90%  | 125% |
| Media (NO DRUG) | 100% | 103% | 75%  | 96%  |
| Media (NO DRUG) | 99%  | 88%  | 94%  | 93%  |
| Media (NO DRUG) | 81%  | 89%  | 91%  | 100% |
| Media (NO DRUG) | 94%  | 80%  | 77%  | 92%  |
| Media (NO DRUG) | 92%  | 91%  | 97%  | 96%  |
| Media (NO DRUG) | 84%  | 86%  | 84%  | 101% |
| Media (NO DRUG) | 90%  | 87%  | 89%  | 100% |
| Media (NO DRUG) | 105% | 111% | 106% | 119% |
| Media (NO DRUG) | 100% | 109% | 95%  | 105% |
| Media (NO DRUG) | 102% | 100% | 84%  | 108% |
| Media (NO DRUG) | 104% | 84%  | 72%  | 98%  |
| Media (NO DRUG) | 92%  | 92%  | 77%  | 105% |
| Media (NO DRUG) | 93%  | 93%  | 89%  | 102% |
| Media (NO DRUG) | 94%  | 84%  | 84%  | 103% |
| Media (NO DRUG) | 102% | 89%  | 97%  | 104% |
| Media (NO DRUG) | 111% | 110% | 97%  | 108% |
| Media (NO DRUG) | 106% | 105% | 83%  | 91%  |
| Media (NO DRUG) | 103% | 93%  | 75%  | 94%  |
| Media (NO DRUG) | 90%  | 102% | 87%  | 103% |
| Media (NO DRUG) | 95%  | 87%  | 88%  | 93%  |
| Media (NO DRUG) | 95%  | 92%  | 85%  | 104% |
| Media (NO DRUG) | 106% | 89%  | 90%  | 84%  |
| Media (NO DRUG) | 106% | 91%  | 94%  | 106% |
| Media (NO DRUG) | 125% | 98%  | 89%  | 108% |
| Media (NO DRUG) | 106% | 115% | 95%  | 97%  |
| Media (NO DRUG) | 108% | 104% | 89%  | 93%  |

|                               |      |      |      |      |
|-------------------------------|------|------|------|------|
| Media (NO DRUG)               | 100% | 95%  | 78%  | 96%  |
| Media (NO DRUG)               | 82%  | 93%  | 89%  | 97%  |
| Media (NO DRUG)               | 104% | 93%  | 97%  | 95%  |
| Media (NO DRUG)               | 83%  | 93%  | 76%  | 107% |
| Media (NO DRUG)               | 101% | 88%  | 83%  | 105% |
| Media (NO DRUG)               | 117% | 109% | 113% | 104% |
| Media (NO DRUG)               | 97%  | 101% | 108% | 112% |
| Media (NO DRUG)               | 92%  | 104% | 94%  | 105% |
| Media (NO DRUG)               | 89%  | 97%  | 98%  | 98%  |
| Media (NO DRUG)               | 100% | 92%  | 112% | 102% |
| Media (NO DRUG)               | 107% | 97%  | 94%  | 91%  |
| Media (NO DRUG)               | 99%  | 93%  | 109% | 98%  |
| Media (NO DRUG)               | 89%  | 96%  | 99%  | 114% |
| Media (NO DRUG)               | 117% | 106% | 105% | 117% |
| Media (NO DRUG)               | 119% | 121% | 104% | 124% |
| Media (NO DRUG)               | 95%  | 102% | 115% | 123% |
| Media (NO DRUG)               | 84%  | 94%  | 110% | 126% |
| Media (NO DRUG)               | 105% | 94%  | 100% | 118% |
| Media (NO DRUG)               | 86%  | 107% | 103% | 117% |
| Media (NO DRUG)               | 89%  | 107% | 85%  | 125% |
| Media (NO DRUG)               | 85%  | 95%  | 97%  | 118% |
| MIS/AMH                       | 2%   | 0%   | 25%  | -7%  |
| MMP-1                         | -1%  | -1%  | 8%   | 1%   |
| MMP-10                        | -4%  | -5%  | -17% | 2%   |
| MMP10 / ANG1                  | 14%  | 12%  | 73%  | 59%  |
| leuregulin-1 alpha/NRG1 alpha | 28%  | 32%  | 230% | 152% |
| euregulin-1 beta 1/NRG1 beta  | 33%  | 26%  | 255% | 168% |
| Neuregulin-1 Isoform SMDF     | 28%  | 30%  | 272% | 186% |
| Neuregulin-1/NRG1             | 12%  | 17%  | 237% | 151% |
| Neuropilin-1                  | 10%  | 11%  | 31%  | 0%   |
| Neuropilin-2                  | 8%   | 4%   | 24%  | 1%   |
| Nidogen-1                     | -9%  | -5%  | 3%   | -11% |
| Nodal                         | 1%   | 2%   | 13%  | -9%  |
| NRG1 beta 1 (CON)             | 45%  | 46%  | 282% | 193% |
| NRG1 beta 1 (CON)             | 15%  | 13%  | 222% | 171% |
| NRG1 beta 1 (CON)             | 27%  | 26%  | 233% | 152% |
| Oncostatin M/OSM              | 6%   | 8%   | 164% | 101% |
| Osteoprotegerin/TNFRSF11B     | 8%   | 5%   | 10%  | -5%  |
| PAI-I                         | -6%  | 0%   | -9%  | 3%   |
| PDGF-DD                       | 5%   | 2%   | 15%  | -5%  |
| Pentraxin 3/TSG-14            | -6%  | 2%   | 10%  | -6%  |

|                                |      |      |      |      |
|--------------------------------|------|------|------|------|
| <b>PIGF</b>                    | -8%  | -12% | -9%  | 15%  |
| <b>Progranulin/PGRN</b>        | -1%  | 2%   | 4%   | -13% |
| <b>R-Spondin 1</b>             | 2%   | 2%   | 6%   | -10% |
| <b>R-Spondin 2</b>             | 6%   | 2%   | -21% | -16% |
| <b>R-Spondin 3</b>             | 7%   | 8%   | 24%  | -3%  |
| <b>R-Spondin 4</b>             | 3%   | 7%   | 29%  | -6%  |
| <b>RANK/TNFRSF11A</b>          | -1%  | 3%   | 21%  | -6%  |
| <b>sFRP-3</b>                  | 8%   | 14%  | 31%  | 2%   |
| <b>sFRP-4</b>                  | 3%   | -1%  | 14%  | -12% |
| <b>sFRP-5</b>                  | 1%   | -2%  | 11%  | -1%  |
| <b>Soggy-1/DkkL1</b>           | 4%   | 1%   | 25%  | 3%   |
| <b>SOST/Sclerostin</b>         | 1%   | 3%   | 8%   | -20% |
| <b>TAFA1/FAM19A1</b>           | -3%  | 2%   | -5%  | -2%  |
| <b>TAFA2/FAM19A2</b>           | 1%   | 4%   | -2%  | -17% |
| <b>TAFA4/FAM19A4</b>           | 9%   | 16%  | 13%  | -1%  |
| <b>TAFA5/FAM19A5</b>           | 9%   | 14%  | 2%   | -6%  |
| <b>Thrombospondin</b>          | -7%  | -3%  | 0%   | -8%  |
| <b>TIMP1</b>                   | 4%   | 0%   | -7%  | 9%   |
| <b>TIMP2</b>                   | -8%  | 1%   | 0%   | 3%   |
| <b>TIMP2 / Osteoprotegerin</b> | -6%  | -7%  | -9%  | -16% |
| <b>TIMP2 / SPARC</b>           | -5%  | -8%  | -7%  | -7%  |
| <b>TL1A/TNFSF15</b>            | 12%  | 13%  | 55%  | 31%  |
| <b>TRAIL/TNFSF10</b>           | -17% | -17% | -69% | -66% |
| <b>TRANCE/TNFSF11/RANK L</b>   | 3%   | 2%   | 27%  | -3%  |
| <b>TROY/TNFRSF19</b>           | 6%   | 3%   | -1%  | 2%   |
| <b>uPAR</b>                    | -8%  | -5%  | -16% | -7%  |
| <b>VEGF</b>                    | -1%  | 3%   | 5%   | -7%  |
| <b>VIP</b>                     | -4%  | -4%  | 0%   | -6%  |
| <b>WIF-1</b>                   | 1%   | 7%   | 33%  | -11% |
| <b>WISP1</b>                   | -3%  | 1%   | -15% | -2%  |
| <b>Wnt-11</b>                  | -1%  | 2%   | 12%  | -4%  |
| <b>Wnt-3a</b>                  | -1%  | 1%   | 13%  | -11% |
| <b>Wnt-5a</b>                  | 3%   | 2%   | 17%  | -10% |
| <b>XCL1/Lymphotactin</b>       | -3%  | -1%  | -4%  | -13% |
